# Supplementary material for: Canadian Guideline on the Management of a Positive Human Papillomavirus Test and Guidance for Specific Populations
Source: Curr Oncol. 2023 Jun 9;30(6):5652–79. doi: 10.3390/curroncol30060425 (PMC10297596; doi:10.3390/curroncol30060425)
Supplement: Supplementary file 1 [file curroncol-30-00425-s001.zip › Supplementary Table S1.pdf]

**Table S1. Literature search strategy—Search for existing clinical practice guidelines related to HPV screening.**

|                           |                                                                           |
|---------------------------|---------------------------------------------------------------------------|
| <b>Requestor:</b>         | James Bentley (via Tiffany Zigras)                                        |
| <b>Request Date:</b>      | 7 June 2021                                                               |
| <b>Project:</b>           | Management of a HPV Positive Test                                         |
| <b>Research Question:</b> | Search for existing clinical practice guidelines related to HPV screening |
| <b>Target Articles:</b>   | Clinical practice guidelines                                              |

### Search Histories

Database: Ovid MEDLINE All

Date searched: 7 June 2021

| #  | Searches                                                                                                           | Results |
|----|--------------------------------------------------------------------------------------------------------------------|---------|
| 1  | exp clinical pathway/                                                                                              | 7392    |
| 2  | exp clinical protocol/                                                                                             | 182538  |
| 3  | exp consensus/                                                                                                     | 17768   |
| 4  | exp consensus development conference/                                                                              | 12573   |
| 5  | exp consensus development conferences as topic/                                                                    | 2990    |
| 6  | critical pathways/                                                                                                 | 7392    |
| 7  | exp guideline/                                                                                                     | 36834   |
| 8  | guidelines as topic/                                                                                               | 41941   |
| 9  | exp practice guideline/                                                                                            | 29652   |
| 10 | practice guidelines as topic/                                                                                      | 126962  |
| 11 | health planning guidelines/                                                                                        | 4157    |
| 12 | (guideline or practice guideline or consensus development conference or consensus development conference, NIH).pt. | 46651   |
| 13 | (position statement* or policy statement* or practice parameter* or best practice*).ti,ab,kf,kw.                   | 40446   |
| 14 | (standards or guideline or guidelines).ti,kf,kw.                                                                   | 124632  |
| 15 | ((practice or treatment* or clinical) adj guideline*).ab.                                                          | 47060   |
| 16 | (CPG or CPGs).ti.                                                                                                  | 6144    |
| 17 | consensus*.ti,kf,kw.                                                                                               | 30978   |
| 18 | consensus*.ab. /freq=2                                                                                             | 30076   |
| 19 | ((critical or clinical or practice) adj2 (path or paths or pathway or pathways or protocol*)).ti,ab,kf,kw.         | 23820   |

|    |                                                                                                                                                                                                                                   |         |
|----|-----------------------------------------------------------------------------------------------------------------------------------------------------------------------------------------------------------------------------------|---------|
| 20 | recommendat*.ti,kf,kw.                                                                                                                                                                                                            | 48222   |
| 21 | (care adj2 (standard or path or paths or pathway or pathways or map or maps or plan or plans)).ti,ab,kf,kw.                                                                                                                       | 72362   |
| 22 | (algorithm* adj2 (screening or examination or test or tested or testing or assessment* or diagnosis or diagnoses or diagnosed or diagnosing)).ti,ab,kf,kw.                                                                        | 9145    |
| 23 | (algorithm* adj2 (pharmacotherap* or chemotherap* or chemotreatment* or therap* or treatment* or intervention*)).ti,ab,kf,kw.                                                                                                     | 11615   |
| 24 | or/1-23 [CADTH CPG filter]                                                                                                                                                                                                        | 693013  |
| 25 | exp Alphapapillomavirus/                                                                                                                                                                                                          | 9034    |
| 26 | Betapapillomavirus/                                                                                                                                                                                                               | 151     |
| 27 | Gammapapillomavirus/                                                                                                                                                                                                              | 67      |
| 28 | Mupapillomavirus/                                                                                                                                                                                                                 | 9       |
| 29 | or/25-28                                                                                                                                                                                                                          | 9194    |
| 30 | exp Early Diagnosis/                                                                                                                                                                                                              | 61270   |
| 31 | (test* or screen* or detect* or diagnos* or self sampl*).ti,kw,kf.                                                                                                                                                                | 1799612 |
| 32 | (genotyp* or methylat*).ti,ab,kw,kf.                                                                                                                                                                                              | 472935  |
| 33 | (ki67* or p16*).ti,ab,kw,kf.                                                                                                                                                                                                      | 32630   |
| 34 | or/30-33                                                                                                                                                                                                                          | 2292971 |
| 35 | 29 and 34                                                                                                                                                                                                                         | 3482    |
| 36 | (human papillomavirus or hpv* or alphapapillomavirus or betapapillomavirus or gammapapillomavirus or mupapillomavirus).ti.                                                                                                        | 34901   |
| 37 | 30 and 36                                                                                                                                                                                                                         | 1639    |
| 38 | ((human papillomavirus or hpv* or alphapapillomavirus or betapapillomavirus or gammapapillomavirus or mupapillomavirus) adj5 (test* or screen* or detect* or self sampl* or genotyp* or methylat* or ki67* or p16*)).ti,ab,kw,kf. | 20581   |
| 39 | Human Papillomavirus DNA Tests/                                                                                                                                                                                                   | 566     |
| 40 | DNA Probes, HPV/                                                                                                                                                                                                                  | 1070    |
| 41 | or/38-40                                                                                                                                                                                                                          | 21036   |
| 42 | 35 or 37 or 41                                                                                                                                                                                                                    | 21698   |
| 43 | 24 and 42                                                                                                                                                                                                                         | 913     |
