# Supplementary material for: Canadian Guideline on the Management of a Positive Human Papillomavirus Test and Guidance for Specific Populations
Source: Curr Oncol. 2023 Jun 9;30(6):5652–79. doi: 10.3390/curroncol30060425 (PMC10297596; doi:10.3390/curroncol30060425)
Supplement: Supplementary file 1 [file curroncol-30-00425-s001.zip › Supplementary Table S2.pdf]

**Table S2. Literature Search Strategy—HPV testing for cervical screening in specific contexts and populations.**

|                           |                                    |
|---------------------------|------------------------------------|
| <b>Requestor:</b>         | James Bentley (via Tiffany Zigras) |
| <b>Request Date:</b>      | 14 October 2021                    |
| <b>Project:</b>           | HPV testing CPG                    |
| <b>Research Question:</b> | 5 questions below (2018-present)   |
| <b>Target Articles:</b>   |                                    |

1. How to triage a positive HPV test
2. Self-sampling HPV test (e.g. acceptability, reliability, use in non-attenders)
3. HPV test results in the immunocompromised population
4. HPV test results in the LGBTQ+ population
5. HPV tests and rural/first nations/newcomer populations (i.e. under screened)

## Search Histories

**10 November 2021**

Ovid Medline

Search saved as Bentley\_HPVTTesting\_2021-11-10

Ovid MEDLINE(R) ALL <1946 to November 09, 2021>

| #  | Search terms                                                                                                                        | Results | Notes |
|----|-------------------------------------------------------------------------------------------------------------------------------------|---------|-------|
| 1  | exp Alphapapillomavirus/                                                                                                            | 8638    |       |
| 2  | Betapapillomavirus/                                                                                                                 | 150     |       |
| 3  | Gammapapillomavirus/                                                                                                                | 66      |       |
| 4  | Mupapillomavirus/                                                                                                                   | 9       |       |
| 5  | exp Papillomavirus Infections/                                                                                                      | 37992   |       |
| 6  | (human papillomavirus or hpv* or alphapapillomavirus or betapapillomavirus or gammapapillomavirus or mupapillomavirus).ti,ab,kw,kf. | 55780   |       |
| 7  | or/1-6                                                                                                                              | 66192   |       |
| 8  | exp Early Diagnosis/                                                                                                                | 59526   |       |
| 9  | (test* or screen* or detect* or diagnos* or self sampl*).ti,ab,kw,kf.                                                               | 7862223 |       |
| 10 | (genotyp* or methylat*).ti,ab,kw,kf.                                                                                                | 464635  |       |
| 11 | (ki67* or p16*).ti,ab,kw,kf.                                                                                                        | 31970   |       |

|    |                                                                                                                                                                                                                                                                                                                                                                                                                                                                             |         |                    |
|----|-----------------------------------------------------------------------------------------------------------------------------------------------------------------------------------------------------------------------------------------------------------------------------------------------------------------------------------------------------------------------------------------------------------------------------------------------------------------------------|---------|--------------------|
| 12 | or/8-11                                                                                                                                                                                                                                                                                                                                                                                                                                                                     | 8153586 |                    |
| 13 | Human Papillomavirus DNA Tests/                                                                                                                                                                                                                                                                                                                                                                                                                                             | 557     |                    |
| 14 | DNA Probes, HPV/                                                                                                                                                                                                                                                                                                                                                                                                                                                            | 1070    |                    |
| 15 | or/13-14                                                                                                                                                                                                                                                                                                                                                                                                                                                                    | 1613    |                    |
| 16 | 7 and 12                                                                                                                                                                                                                                                                                                                                                                                                                                                                    | 35721   |                    |
| 17 | 15 or 16                                                                                                                                                                                                                                                                                                                                                                                                                                                                    | 35983   |                    |
| 18 | (triag* or manage* or progress*).ti,ab,kw,kf.                                                                                                                                                                                                                                                                                                                                                                                                                               | 2651099 |                    |
| 19 | ((human papillomavirus or hpv*) adj2 positiv*).ti,ab,kw,kf.                                                                                                                                                                                                                                                                                                                                                                                                                 | 10435   |                    |
| 20 | 18 and 19                                                                                                                                                                                                                                                                                                                                                                                                                                                                   | 2266    |                    |
| 21 | limit 20 to yr="2018 -Current"                                                                                                                                                                                                                                                                                                                                                                                                                                              | 750     | Question 1 results |
| 22 | self sampl*.ti,ab,kw,kf.                                                                                                                                                                                                                                                                                                                                                                                                                                                    | 881     |                    |
| 23 | non attender*.ti,ab,kw,kf.                                                                                                                                                                                                                                                                                                                                                                                                                                                  | 497     |                    |
| 24 | 7 and 22 and 23                                                                                                                                                                                                                                                                                                                                                                                                                                                             | 21      |                    |
| 25 | limit 24 to yr="2018 -Current"                                                                                                                                                                                                                                                                                                                                                                                                                                              | 13      | Question 2 results |
| 26 | exp Immunocompromised Host/                                                                                                                                                                                                                                                                                                                                                                                                                                                 | 26632   |                    |
| 27 | (Immunocompromise* or immunosuppress* or immunodeficien*).ti,ab,kw,kf.                                                                                                                                                                                                                                                                                                                                                                                                      | 337755  |                    |
| 28 | or/26-27                                                                                                                                                                                                                                                                                                                                                                                                                                                                    | 350183  |                    |
| 29 | 17 and 28                                                                                                                                                                                                                                                                                                                                                                                                                                                                   | 1929    |                    |
| 30 | limit 29 to yr="2018 -Current"                                                                                                                                                                                                                                                                                                                                                                                                                                              | 466     | Question 3 results |
| 31 | exp "Sexual and Gender Minorities"/                                                                                                                                                                                                                                                                                                                                                                                                                                         | 10669   |                    |
| 32 | bisexuality/ or exp homosexuality/ or transsexualism/                                                                                                                                                                                                                                                                                                                                                                                                                       | 35983   |                    |
| 33 | (homosexual* or gay or gays or lesbian* or LGB* or bisexual* or queer or "sexual and gender minorit*" or sexual minorit* or men who have sex with men or women who have sex with women or two-spirit* or gender minorit* or genderqueer or intersex* or transgender* or trans female or trans male or transman or trans man or transmen or trans men or transpeople or trans people or transwoman or trans woman or transwomen or trans women or transsexual*).ti,ab,kw,kf. | 53330   |                    |
| 34 | or/31-33                                                                                                                                                                                                                                                                                                                                                                                                                                                                    | 63057   |                    |
| 35 | 17 and 34                                                                                                                                                                                                                                                                                                                                                                                                                                                                   | 871     |                    |
| 36 | limit 35 to yr="2018 -Current"                                                                                                                                                                                                                                                                                                                                                                                                                                              | 300     | Question 4 results |
| 37 | exp Indigenous Canadians/                                                                                                                                                                                                                                                                                                                                                                                                                                                   | 4069    |                    |
| 38 | Rural Population/                                                                                                                                                                                                                                                                                                                                                                                                                                                           | 64970   |                    |
| 39 | Rural Health/                                                                                                                                                                                                                                                                                                                                                                                                                                                               | 23744   |                    |
| 40 | exp "Emigrants and Immigrants"/                                                                                                                                                                                                                                                                                                                                                                                                                                             | 14171   |                    |
| 41 | Refugees/                                                                                                                                                                                                                                                                                                                                                                                                                                                                   | 11628   |                    |
| 42 | (Indigenous or first nation* or metis or inuit or aboriginal or native or rural or immigrant* or newcomer* or refugee*).ti,ab,kw,kf.                                                                                                                                                                                                                                                                                                                                        | 463528  |                    |
| 43 | or/37-42                                                                                                                                                                                                                                                                                                                                                                                                                                                                    | 494039  |                    |
| 44 | 17 and 43                                                                                                                                                                                                                                                                                                                                                                                                                                                                   | 923     |                    |
| 45 | limit 44 to yr="2018 -Current"                                                                                                                                                                                                                                                                                                                                                                                                                                              | 316     | Question 5 results |
