# Supplementary material for: Canadian Guideline on the Management of a Positive Human Papillomavirus Test and Guidance for Specific Populations
Source: Curr Oncol. 2023 Jun 9;30(6):5652–79. doi: 10.3390/curroncol30060425 (PMC10297596; doi:10.3390/curroncol30060425)
Supplement: Supplementary file 1 [file curroncol-30-00425-s001.zip › Supplementary Table S3.pdf]

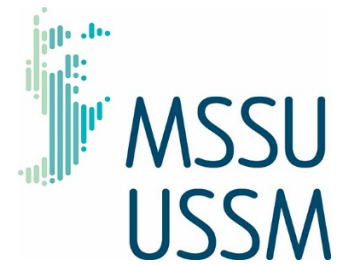

Table S3. Literature Search Strategy—How to manage a positive HPV test after a hysterectomy.

|                    |                                                                       |
|--------------------|-----------------------------------------------------------------------|
| Requestor:         | James Bentley (via Tiffany Zigras)                                    |
| Request Date:      | 4 February 2022                                                       |
| Project:           | HPV testing CPG                                                       |
| Research Question: | How to manage a positive HPV test after a hysterectomy (2018-present) |
| Target Articles:   |                                                                       |

## Search Histories

7 February 2022

Ovid Medline

Search saved as Bentley\_HPVTTesting\_Hysterectomy\_2022-02-07

Ovid MEDLINE(R) ALL <1946 to February 04, 2022>

| #  | Search terms                                                                                                                        | Results |
|----|-------------------------------------------------------------------------------------------------------------------------------------|---------|
| 1  | exp Alphapapillomavirus/                                                                                                            | 8972    |
| 2  | Betapapillomavirus/                                                                                                                 | 151     |
| 3  | Gammapapillomavirus/                                                                                                                | 67      |
| 4  | Mupapillomavirus/                                                                                                                   | 9       |
| 5  | exp Papillomavirus Infections/                                                                                                      | 38703   |
| 6  | (human papillomavirus or hpv* or alphapapillomavirus or betapapillomavirus or gammapapillomavirus or mupapillomavirus).ti,ab,kw,kf. | 56627   |
| 7  | or/1-6                                                                                                                              | 67106   |
| 8  | exp Early Diagnosis/                                                                                                                | 61027   |
| 9  | (test* or screen* or detect* or diagnos* or self sampl*).ti,ab,kw,kf.                                                               | 7981897 |
| 10 | (genotyp* or methylat*).ti,ab,kw,kf.                                                                                                | 471508  |
| 11 | (ki67* or p16*).ti,ab,kw,kf.                                                                                                        | 32520   |
| 12 | or/8-11                                                                                                                             | 8277312 |
| 13 | Human Papillomavirus DNA Tests/                                                                                                     | 564     |
| 14 | DNA Probes, HPV/                                                                                                                    | 1070    |
| 15 | or/13-14                                                                                                                            | 1620    |
| 16 | 7 and 12                                                                                                                            | 36269   |
| 17 | 15 or 16                                                                                                                            | 36531   |
| 18 | exp Hysterectomy/                                                                                                                   | 32591   |
| 19 | Hysterectom*.ti,ab,kw,kf.                                                                                                           | 40494   |
| 20 | or/18-19                                                                                                                            | 51843   |
| 21 | 17 and 20                                                                                                                           | 447     |
| 22 | limit 21 to yr="2018 -Current"                                                                                                      | 123     |
